# Supplementary material
Source: publisher figshare collection journal article supplement (https://springernature.figshare.com/ndownloader/files/23574912)
Supplement: Supplementary file 1 [file 23574912]

## Reference treatment: CON

Treatment Effect

Mean with 95%CI and 95%PrI

DGFHT -0.09 (-0.94,0.77) (-1.67,1.50)

EBAHT 0.22 (-0.41,0.84) (-1.24,1.67)

UDFHT 0.27 (-0.72,1.27) (-1.40,1.95)

UPAHT 0.48 (0.01,0.96) (-0.90,1.87)

EXAHT 0.51 (-0.19,1.22) (-0.98,2.01)

EPAHT 0.61 (-0.11,1.33) (-0.90,2.12)

-1.7 -0.8 0 1.1 2.1
