# Supplementary material
Source: publisher figshare collection journal article supplement (https://springernature.figshare.com/ndownloader/files/23574912)
Supplement: Supplementary file 2 [file 23574912]

## Reference treatment: CON

Treatment Effect

Mean with 95%CI and 95%PrI

UDFHT -0.37 (-1.18,0.44) (-1.52,0.78)

EXAHT -0.06 (-1.19,1.08) (-1.61,1.49)

EPAHT 0.09 (-0.49,0.66) (-0.77,0.95)

UPAHT 0.19 (-0.12,0.50) (-0.39,0.78)

EBAHT 0.31 (-0.16,0.78) (-0.44,1.06)

-1.6 -0.8 0 .7 1.5
